# Supplementary material for: Growth suppression by MYC inhibition in small cell lung cancer cells with TP53 and RB1 inactivation
Source: PubMed Central journal article supplement (PMC5058735; doi:10.18632/oncotarget.8826), 2016-04-18
Supplement: oncotarget-07-31014-s001.pdf [file oncotarget-07-31014-s001.pdf]

SUPPLEMENTARY FIGURES AND TABLES

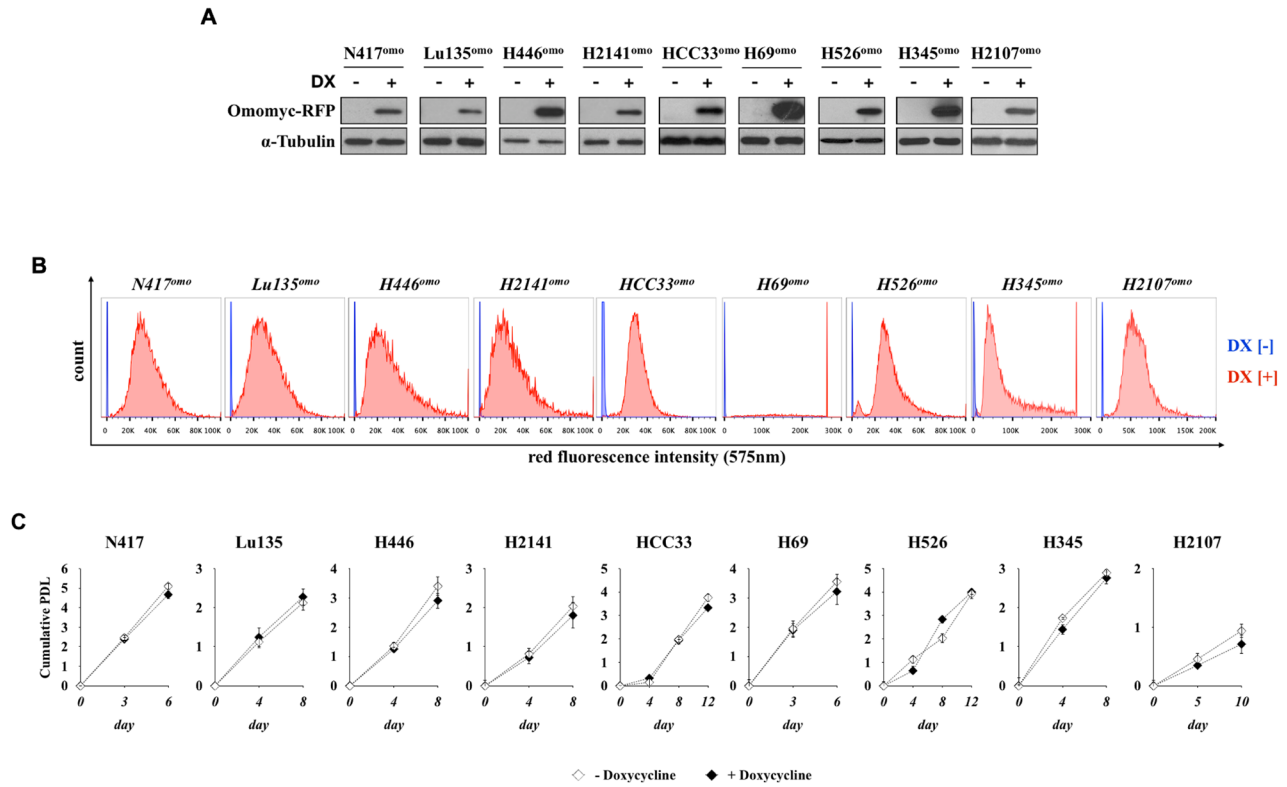

**Supplementary Figure S1: Induction of Omomyc in SCLC cell lines.** **A.** Immunoblot analysis of Omomyc-RFP in cells after 24 hr of doxycycline (DX) addition to culture medium. **B.** Flow cytometric analysis of red fluorescence (575nm ±13) after 48 hr (N417, Lu135, H446, H2141, H69, H345), 72 hr (H2107) or 96 hr (HCC33, H526) of DX addition. **C.** Effects of DX on the growth of parental SCLC cell lines. The graphs show the population doubling level (PDL) of each cell line with or without DX.

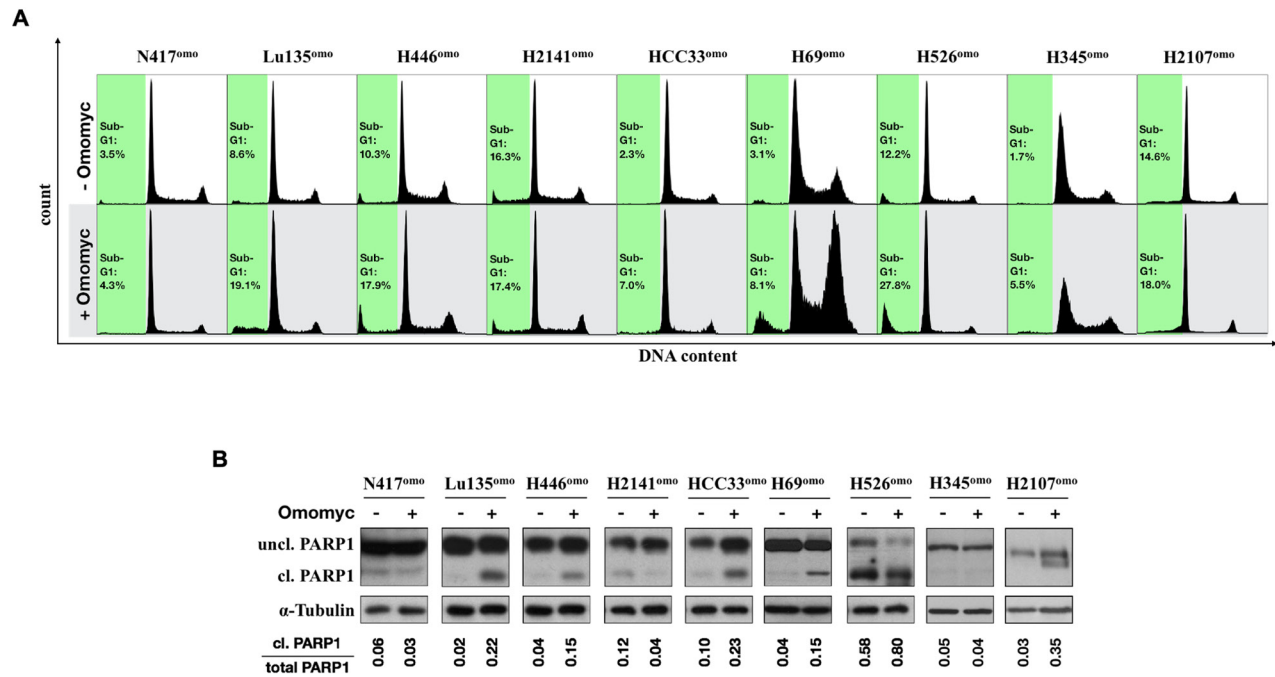

**Supplementary Figure S2: Omomyc induces apoptosis.** **A.** Percentage of cells in sub-G1 phase after 3 days (N417<sup>omo</sup>, H69<sup>omo</sup>), 96 hr (Lu135<sup>omo</sup>, H446<sup>omo</sup>, H2141<sup>omo</sup>, H345<sup>omo</sup>), or 1 week (HCC33<sup>omo</sup>, H526<sup>omo</sup>, H2107<sup>omo</sup>) of Omomyc induction. **B.** Immunoblot analysis of PARP1 after one passage in culture in the presence or absence of Omomyc. Band intensity was quantified by densitometry and the ratio of cleaved/total (uncleaved+cleaved) PARP1 was calculated.

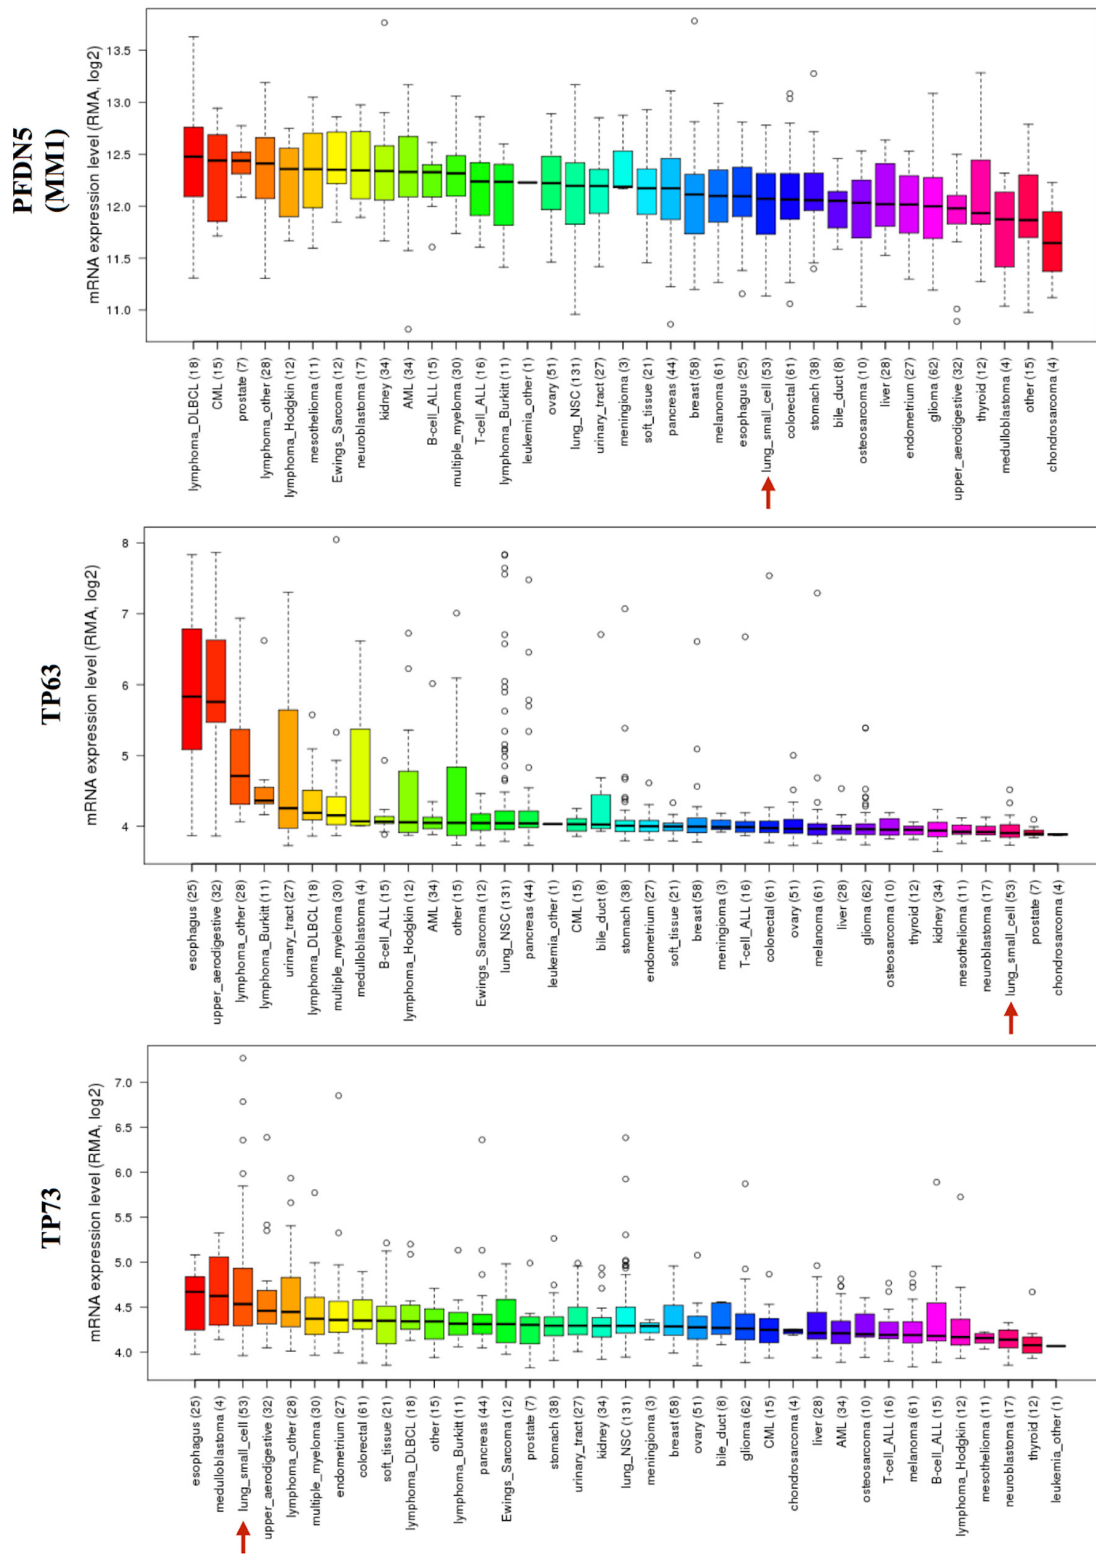

**Supplementary Figure S3: Meta-analysis of TP73, TP63, and MM1 mRNA expression.** Query of mRNA expression from the Cancer Cell Line Encyclopedia (CCLE). The numbers in parenthesis along the y-axis indicate the number of tumor cell lines used for each sample set. RMA, robust multi-array average; NSC, non-small-cell; CML, chronic myelogenous leukemia; ALL, acute lymphoblastic leukemia; DLBCL, diffuse large B-cell lymphoma; AML, acute myelogenous leukemia. Small cell lung cancer is indicated by red arrows.

**Supplementary Table S1: TP53 status in SCLC cell lines used in this study**

| Cell line | Type of mutation | DNA sequence change | Amino acid change | Pubmed Id         |
|-----------|------------------|---------------------|-------------------|-------------------|
| N417      | Nonsense         | c.892G>T            | p.E298*           | 1565469; 22941189 |
| Lu135     | Missense         | c.730G>T            | p.G244C           | 1312700           |
| H446      | Missense         | c.461G>T            | p.G244C           | 15188009          |
| H2141     | Nonsense         | c.625A>T            | p.R209*           | 1312696           |
| HCC33     | Missense         | c.725G>A            | p.C242Y           | 22460905          |
| H69       | Nonsense         | c.511G>T            | p.E171*           | 1648702           |
| H526      | Splice site      | c.97-1G>C           | -                 | 2164047; 15188009 |
| H345      | Missense         | c.707A>G            | p.Y236C           | 15188009          |
| H2107     | Nonsense         | c.491T>A            | p.K101*           | 22941189          |

**Supplementary Table S2: RB1 status in SCLC cell lines used in this study**

| Cell line | Type of mutation         | DNA sequence change           | Amino acid change | Pubmed Id          |
|-----------|--------------------------|-------------------------------|-------------------|--------------------|
| N417      | Splice site              | c.2686+1G>A                   | -                 | 22941189; 2159370  |
| Lu135     | Frameshift               | c.1980_1983delCCGG            | p.R661fs*1        | 15188009           |
| H446      | Splice site              | c.2127-2A>T                   | -                 | 15188009           |
| H2141     | Splice site              | c.1499-2A>G                   | -                 | 15188009           |
| HCC33     | Frameshift               | c.1202delT                    | p.S402fs*8        | 15188009           |
| H69       | Nonsense                 | c.2242G>T                     | p.E748*           | 15188009; 2159370  |
| H526      | Nonsense                 | c.91G>T                       | p.E31*            | 15188009; 2159370  |
| H345      | Deletion - Intronic Site | c.106850_118816del            | -                 | 15188009           |
| H2107     | Splice site; Frameshift  | c.1381+1G>T;<br>c.583_584insT | p.W195fs*8        | 15188009; 22941189 |
